# Supplementary material
Source: Springer Nature journal article supplement (https://www.springermedizin.de/resource/supplementary/12960_2013_387_MOESM4_ESM.pdf/9569984)
Supplement: MOESM4 [file 9569984]

**Interventions: The Initial Response to Research Barriers**

**Training programs**

Focused training in critical skills

Technical research methodology

Manuscript writing

Grant proposal development

Human research subject development

**Mentorship and the development of joint research proposals**

UEM ↔ USCD

UEM, ↔ UFBA

UEM ↔ IHMT

UEM ↔ Unilurio

UNILURIO ↔ IHMT

**Research Priority Development**

**Laboratory Enhancements**

Translational research laboratory

Pathology laboratory

**Financial resources, grant administration and policies**

Mozambique Institute for Health Education and Research (MIHER)

Research administration and ethics training

**Digital and open source library**

Vitually library

Digital reference materials

SEACOMM connectivity

Fixed base and wireless internet hardware enhancements

**Human subjects research protection and ethical approvals**

UEM/MCH Institutional Bioethical Committee

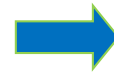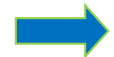

**Training Faculty**

Eduardo Mondlane University

University of California, San Diego

Federal University of Bahia

IHMT-UL, Oporto University,

US National Cancer Institute

**Major Research Priorities**

Infectious diseases

HIV, tuberculosis, malaria  
Neglected tropical diseases

Cardiovascular disease and stroke

Cancer

Maternal and Child Health

Surgical and medical care delivery

Trauma
